# Supplementary material
Source: Springer Nature journal article supplement (https://www.springermedizin.de/resource/supplementary/13012_2012_606_MOESM4_ESM.pdf/9630378)
Supplement: MOESM4 [file 9630378]

**Additional File 4:** Non-manual specified BCTs delivered in behavioural support sessions, presented according to session type and ranked according to frequency of transcripts featured in.

| <b>BCT label</b>                                                           | <b>Number of transcripts featured in (% of total)</b> |
|----------------------------------------------------------------------------|-------------------------------------------------------|
| <i>Pre-quit transcripts (max 8)</i>                                        |                                                       |
| ‘provide feedback on progress and performance’                             | 8 (100%)                                              |
| ‘provide normative information on other’s experiences’                     | 8 (100%)                                              |
| ‘provide options for additional/later support’                             | 8 (100%)                                              |
| ‘build rapport’                                                            | 8 (100%)                                              |
| ‘general practitioner communication approaches’                            | 8 (100%)                                              |
| ‘provide reassurance’                                                      | 8 (100%)                                              |
| ‘explain how nicotine dependence develops’                                 | 7 (87.5%)                                             |
| ‘boost motivation and self-efficacy’                                       | 6 (75%)                                               |
| ‘emphasise choice’                                                         | 6 (75%)                                               |
| ‘provide information on the consequences of smoking and smoking cessation’ | 5 (62.5%)                                             |
| ‘barrier identification and problem solving’                               | 5 (62.5%)                                             |
| ‘reflective listening’                                                     | 5 (62.5%)                                             |
| ‘goal setting’                                                             | 4 (50.0%)                                             |
| ‘Advise on conserving mental resources’                                    | 4 (50.0%)                                             |
| ‘Ask about current stop smoking medications the smoker is using’           | 4 (50.0%)                                             |
| ‘strengthen ex-smoker identity’                                            | 3 (37.5%)                                             |
| ‘advise on avoidance of cues for smoking’                                  | 3 (37.5%)                                             |
| ‘explain expectations regarding the treatment programme’                   | 3 (37.5%)                                             |
| ‘provide rewards contingent on effort or progress’                         | 2 (25.0%)                                             |
| ‘advise on changing routine’                                               | 2 (25.0%)                                             |
| ‘tailor interactions appropriately’                                        | 2 (25.0%)                                             |
| ‘offer/direct towards appropriate written materials’                       | 2 (25.0%)                                             |
| ‘prompt behavioural substitution’                                          | 2 (25.0%)                                             |
| ‘distract from motivation to engage in behaviour’                          | 1 (12.5%)                                             |
| ‘facilitate restructuring of social life’                                  | 1 (12.5%)                                             |
| ‘facilitate relapse prevention and coping’                                 | 1 (12.5%)                                             |
| <i>Quit-day transcripts (max 4)</i>                                        |                                                       |
| ‘provide feedback on progress and performance’                             | 4 (100%)                                              |
| ‘provide normative information on other’s experiences’                     | 4 (100%)                                              |
| ‘emphasise choice’                                                         | 4 (100%)                                              |
| ‘provide information on the consequences of smoking and smoking cessation’ | 3 (75%)                                               |
| ‘advise on changing routine’                                               | 3 (75%)                                               |
| ‘explain how nicotine dependence develops’                                 | 3 (75%)                                               |
| ‘reflective listening’                                                     | 3 (75%)                                               |
| ‘provide rewards contingent on effort or progress’                         | 2 (50%)                                               |
| ‘goal setting’                                                             | 2 (50%)                                               |
| ‘prompt review of set goals’                                               | 2 (50%)                                               |
| ‘explain expectations regarding the treatment programme’                   | 2 (50%)                                               |
| ‘boost motivation and self-efficacy’                                       | 2 (50%)                                               |
| ‘create or reinforce negative associations’                                | 2 (50%)                                               |
| ‘barrier identification and problem solving’                               | 2 (50%)                                               |
| ‘provide options for additional/later support’                             | 2 (50%)                                               |
| ‘build rapport’                                                            | 2 (50%)                                               |
| ‘general practitioner communication approaches’                            | 2 (50%)                                               |
| ‘provide reassurance’                                                      | 2 (50%)                                               |

|                                                                 |         |
|-----------------------------------------------------------------|---------|
| ‘provide information on withdrawal symptoms’                    | 2 (50%) |
| ‘advise on use of social support’                               | 1 (25%) |
| ‘advise on avoidance of cues for smoking’                       | 1 (25%) |
| ‘advise on conserving mental resources’                         | 1 (25%) |
| ‘advise on environmental restructuring’                         | 1 (25%) |
| ‘prompt self-recording’                                         | 1 (25%) |
| ‘action planning/develop treatment plan’                        | 1 (25%) |
| ‘help identify reasons for wanting/not wanting to stop smoking’ | 1 (25%) |
| ‘strengthen ex-smoker identity’                                 | 1 (25%) |
| ‘prompt self-reward’                                            | 1 (25%) |
| ‘facilitate restructuring of social life’                       | 1 (25%) |
| ‘emphasise the importance of abrupt cessation’                  | 1 (25%) |

---

***Post-quit transcripts (max = 22)***

---

|                                                                            |            |
|----------------------------------------------------------------------------|------------|
| ‘provide feedback on progress and performance’                             | 22 (100%)  |
| ‘information gathering and assessment’                                     | 22 (100%)  |
| ‘boost motivation and self-efficacy’                                       | 20 (90.1%) |
| ‘provide normative information on other’s experiences’                     | 18 (90.0%) |
| ‘reflective listening’                                                     | 16 (72.7%) |
| ‘general practitioner communication approaches’                            | 15 (68.1%) |
| ‘provide reassurance’                                                      | 15 (68.1%) |
| ‘strengthen ex-smoker identity’                                            | 14 (63.6%) |
| ‘barrier identification and problem solving’                               | 14 (63.6%) |
| ‘explain how nicotine dependence develops’                                 | 13 (59.1%) |
| ‘provide information on withdrawal symptoms’                               | 10 (45.5%) |
| ‘emphasise choice’                                                         | 9 (40.1%)  |
| ‘provide information on the consequences of smoking and smoking cessation’ | 8 (36.4%)  |
| ‘advise on changing routine’                                               | 7 (31.8%)  |
| ‘build general rapport’                                                    | 7 (31.8%)  |
| ‘advise on conserving mental resources’                                    | 6 (27.3%)  |
| ‘explain expectations regarding the treatment programme’                   | 6 (27.3%)  |
| ‘help identify reasons for wanting/not wanting to stop smoking’            | 6 (27.3%)  |
| ‘create or reinforce negative associations’                                | 6 (27.3%)  |
| ‘prompt behavioural substitution’                                          | 5 (22.7%)  |
| ‘emphasise the importance of abrupt cessation’                             | 4 (18.2%)  |
| ‘distract from motivation to engage in behaviour’                          | 4 (18.2%)  |
| ‘action planning/develop treatment plan’                                   | 4 (18.2%)  |
| ‘prompt self-reward’                                                       | 4 (18.2%)  |
| ‘ask about stop smoking medications the client is currently using’         | 4 (18.2%)  |
| ‘advise on avoidance of smoking cues’                                      | 2 (9.09%)  |
| ‘facilitate restructuring of social life’                                  | 2 (9.09%)  |
| ‘prompt commitment from the client there and then’                         | 2 (9.09%)  |
| ‘advise on use of social support’                                          | 2 (9.09%)  |
| ‘advise on environmental restructuring’                                    | 1 (4.55%)  |
| ‘prompt self-recording’                                                    | 1 (4.55%)  |
| ‘goal setting’                                                             | 1 (4.55%)  |
| ‘offer/direct towards appropriate written materials’                       | 1 (4.55%)  |
| ‘tailor interactions appropriately’                                        | 1 (4.55%)  |
| ‘advise on weight control’                                                 | 1 (4.55%)  |
| ‘set graded tasks’                                                         | 1 (4.55%)  |

---
